# Supplementary material for: Glutathione peroxidase-1 regulates adhesion and metastasis of triple-negative breast cancer cells via FAK signaling
Source: PubMed Central journal article supplement — Redox Biol. 2019 Nov 26;29:101391. doi: 10.1016/j.redox.2019.101391 (PMC6906704; doi:10.1016/j.redox.2019.101391), 2019-11-26
Supplement: mmc1.pdf [file mmc1.pdf]

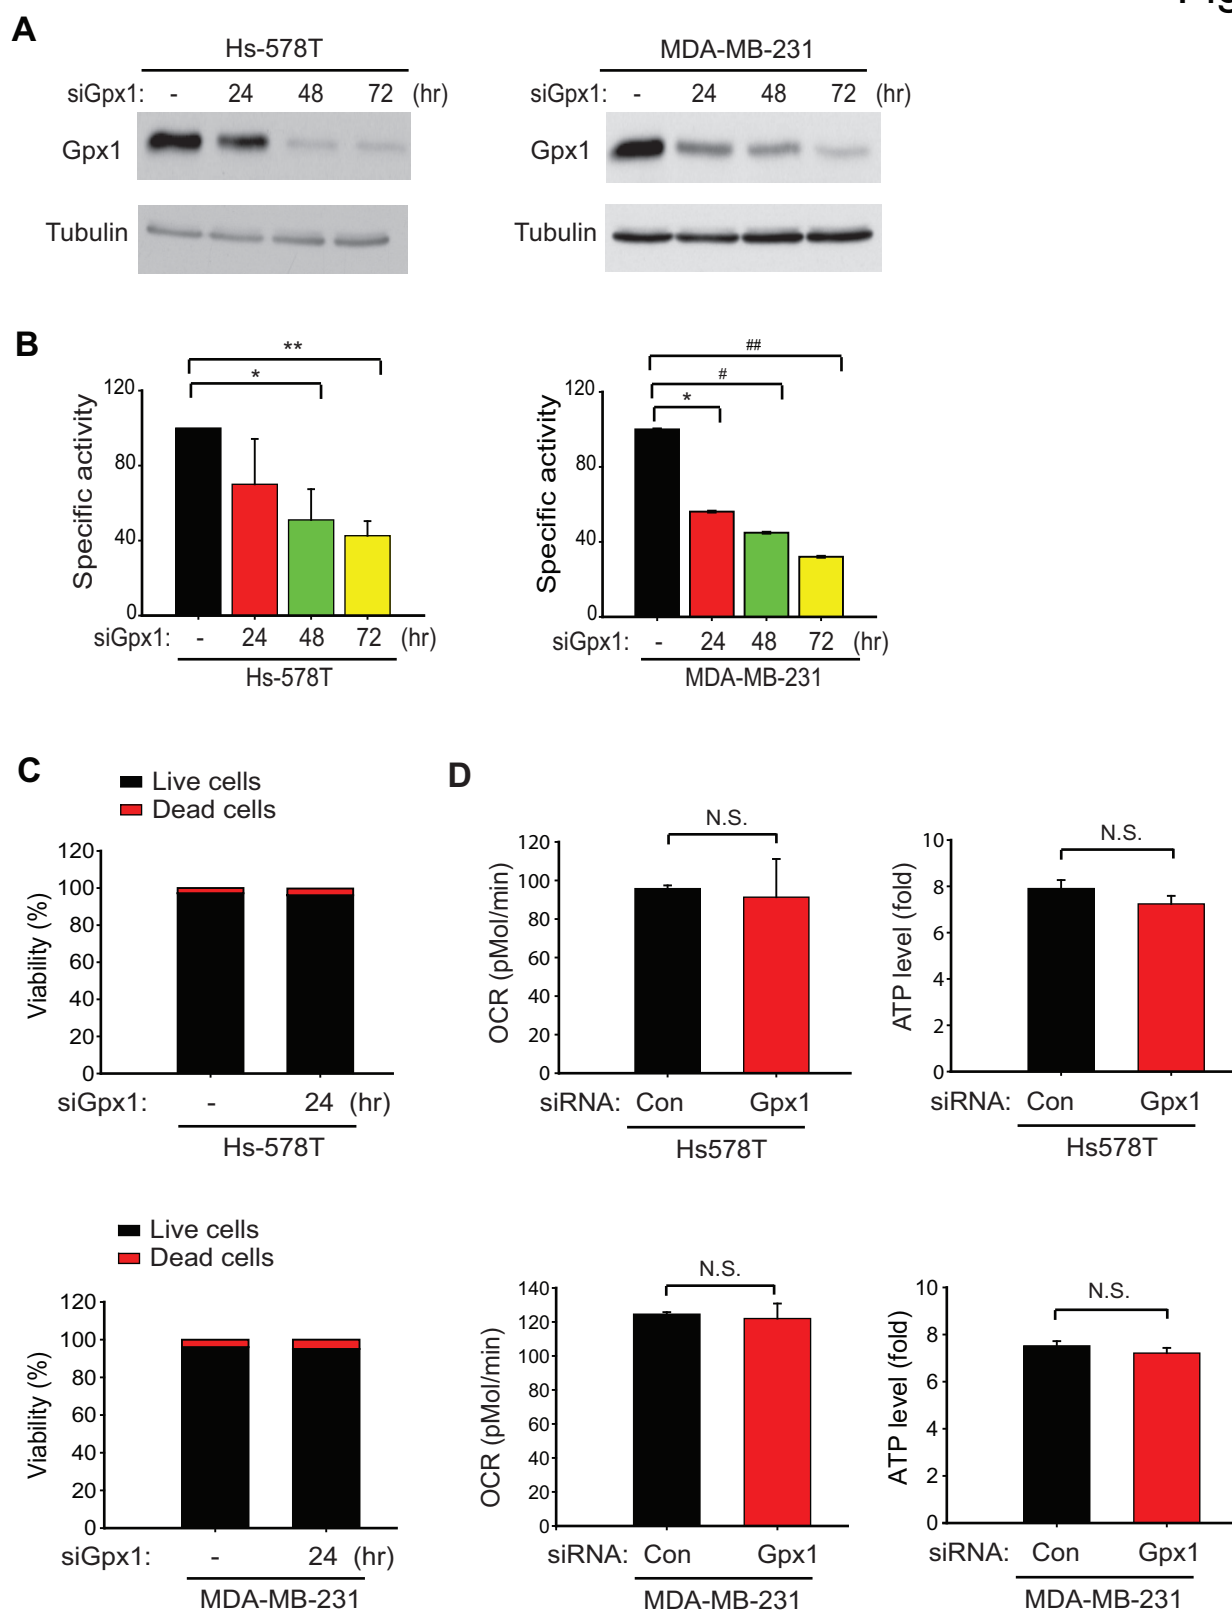

**Figure S1. Characterization of Gpx1 depletion in the TNBC cells.**

**A.** Knockdown of Gpx1 expression by the specific siRNA transfection.

**B.** GSH-dependent peroxidase activity in the cell extracts of the Gpx1-depleted TNBC cells prepared in panel A. Data in the graph are means  $\pm$  SD of the specific activity ( $n = 3$ ,  $*P < 0.005$ ,  $**P < 0.001$ ,  $\#P < 0.0001$ ,  $\#\#P < 0.00005$ )

**C.** Trypan blue assay for cell death with the Gpx1-depleted TNBC cells. Data in the graph are means  $\pm$  SD of the percent of live and dead cells versus total cells ( $n = 3$ ).

**D.** Metabolic activity in the Gpx1-depleted TNBC cells. ATP level and oxygen consumption rate (OCR) were measured in the control and Gpx1-depleted TNBC cells by the luciferase-based assay and live-cell metabolic assay (Seahorse XF analyzer, Agilent), respectively. OCR is measured with  $2 \times 10^4$  cells. Data in the graph are means  $\pm$  SD of the fold change or  $O_2$  consumption rate ( $n = 3$ ). N.S., not significant.

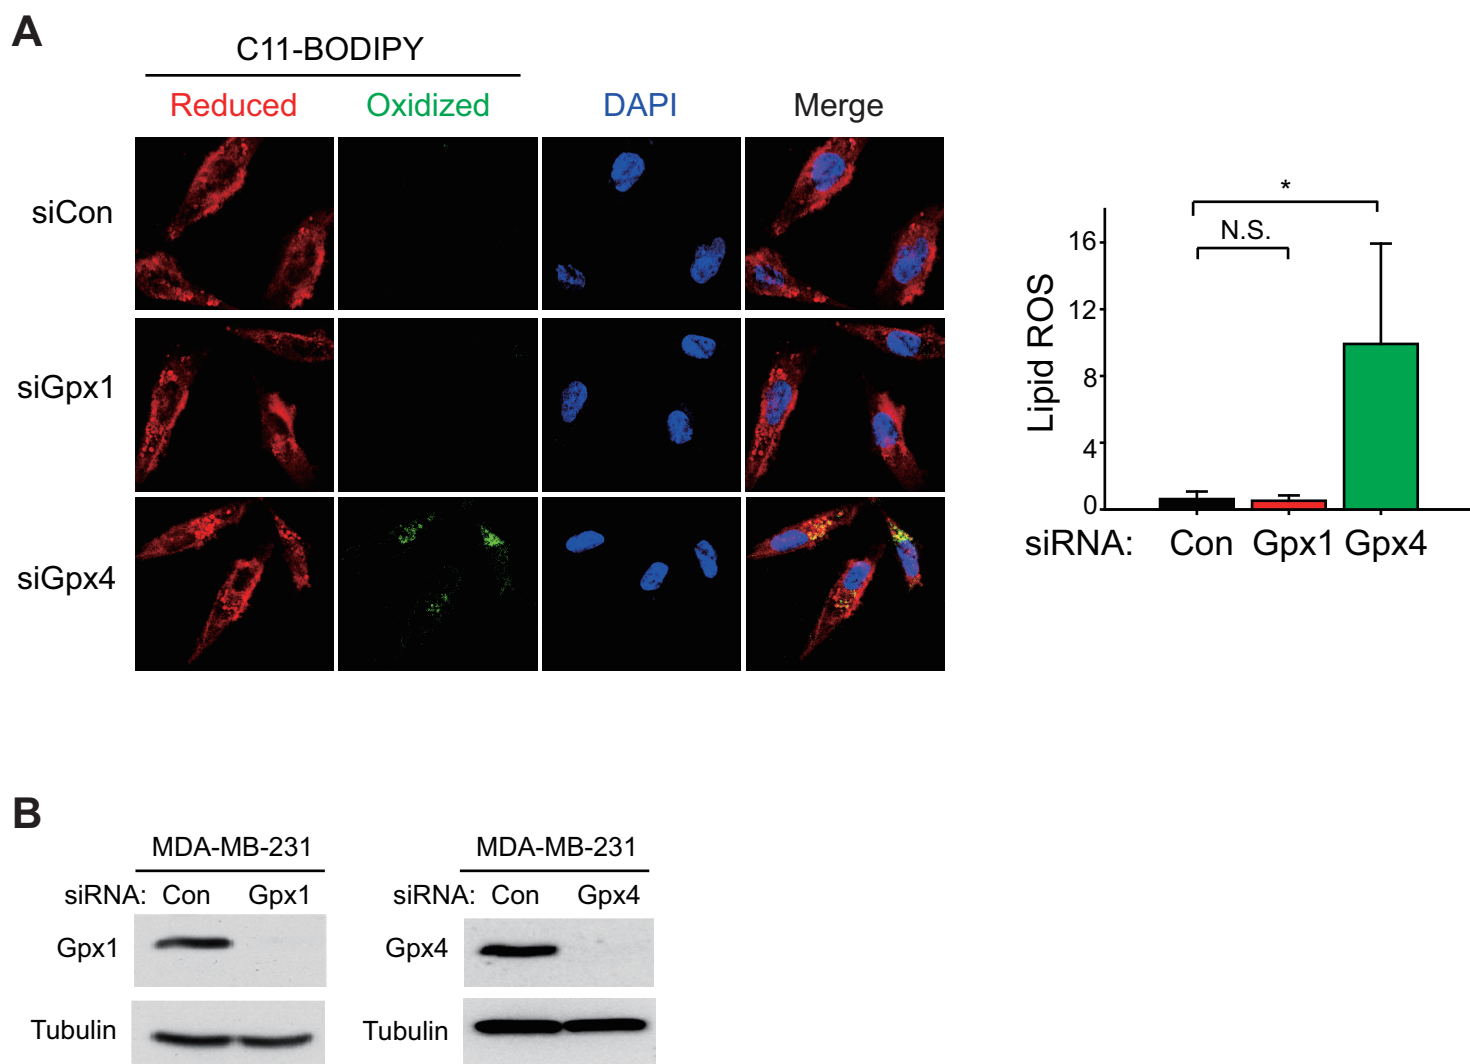

**Figure S2. Level of lipid hydroperoxide in the Gpx1- or Gpx4-depleted MDA-MB-231 cells (Related to Fig. 3).** The level of lipid hydroperoxide (LOOH) was measured using a LOOH-specific fluorescent probe, C11-BODIPY<sup>581/591</sup>, in the MDA-MB-231 cells (**A**). Cells were transfected with either control, Gpx1, or Gpx4 siRNA (siCon, siGpx1, or siGpx4) for 48 hr and treated with C11-BODIPY (1  $\mu$ M). The Gpx depletion was verified by immunoblotting (**B**). Data in the graph are means  $\pm$  SD of the relative ratios of green versus red fluorescence intensities averaged from 40 cells ( $n = 3$ ,  $*P < 0.0001$ ). Representative images are shown. N.S., not significant.

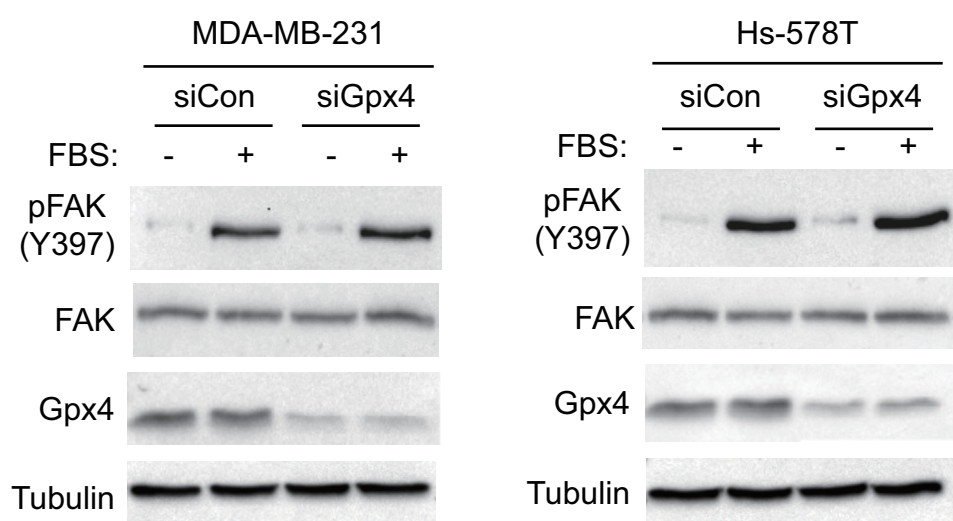

**Figure S3. Effect of Gpx4 depletion on serum-induced FAK kinase activation (Related to Fig. 4).**

The activation of FAK kinases was examined by immunoblotting with the phosphorylation-specific antibodies in the control- and Gpx4-depleted MDA-MB-231 and Hs578T cells. The experiment was carried out as done for Gpx1. Representative blots are shown ( $n = 2$ ).

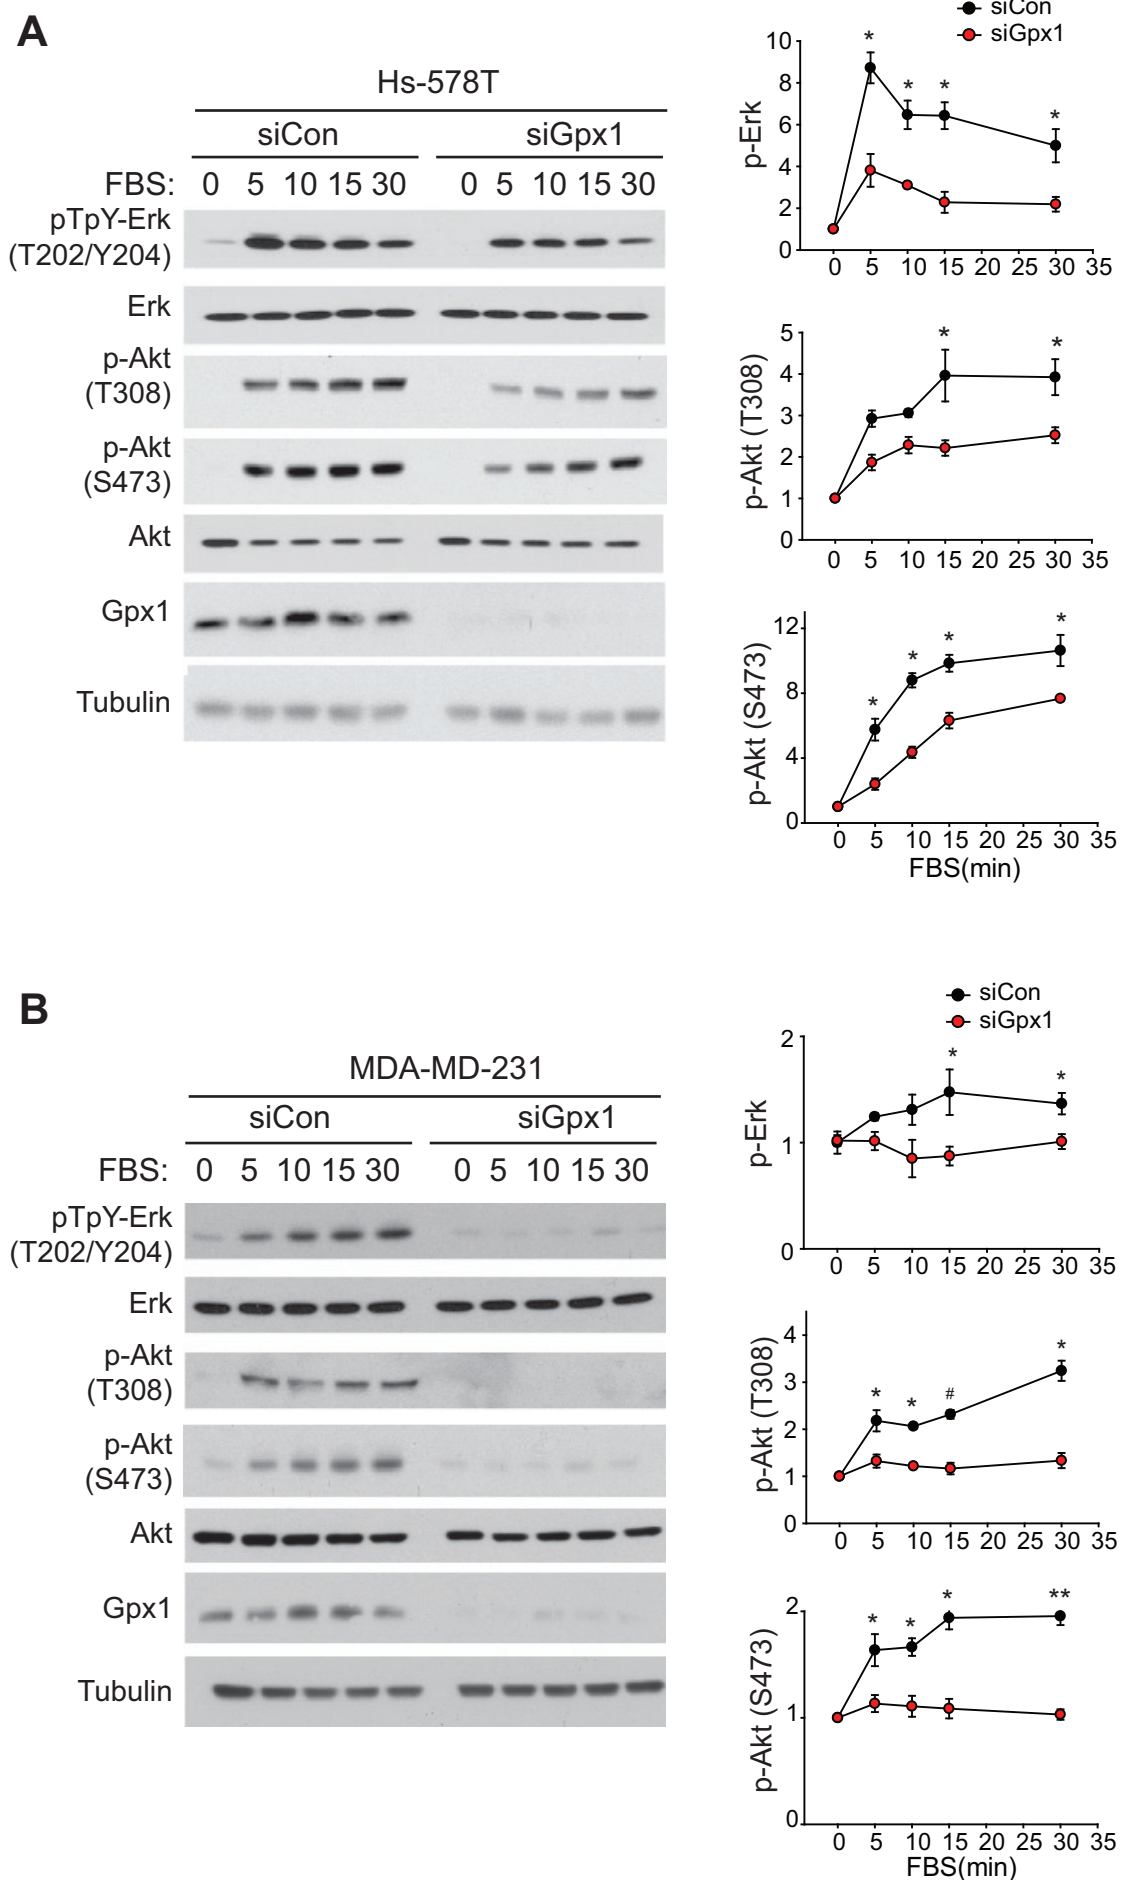

**Figure S4. Effect of Gpx1 depletion on serum-induced kinase activation.**

The activation of ERK and Akt kinases was examined by immunoblotting with the phosphorylation-specific antibodies in the Gpx1-depleted MDA-MB-231 (A) and Hs578T (B) cells. Data in the graph are means  $\pm$  SD of the fold increase ( $n = 3$ , \* $P < 0.05$ , \*\* $P < 0.001$ , # $P < 0.0005$ ).

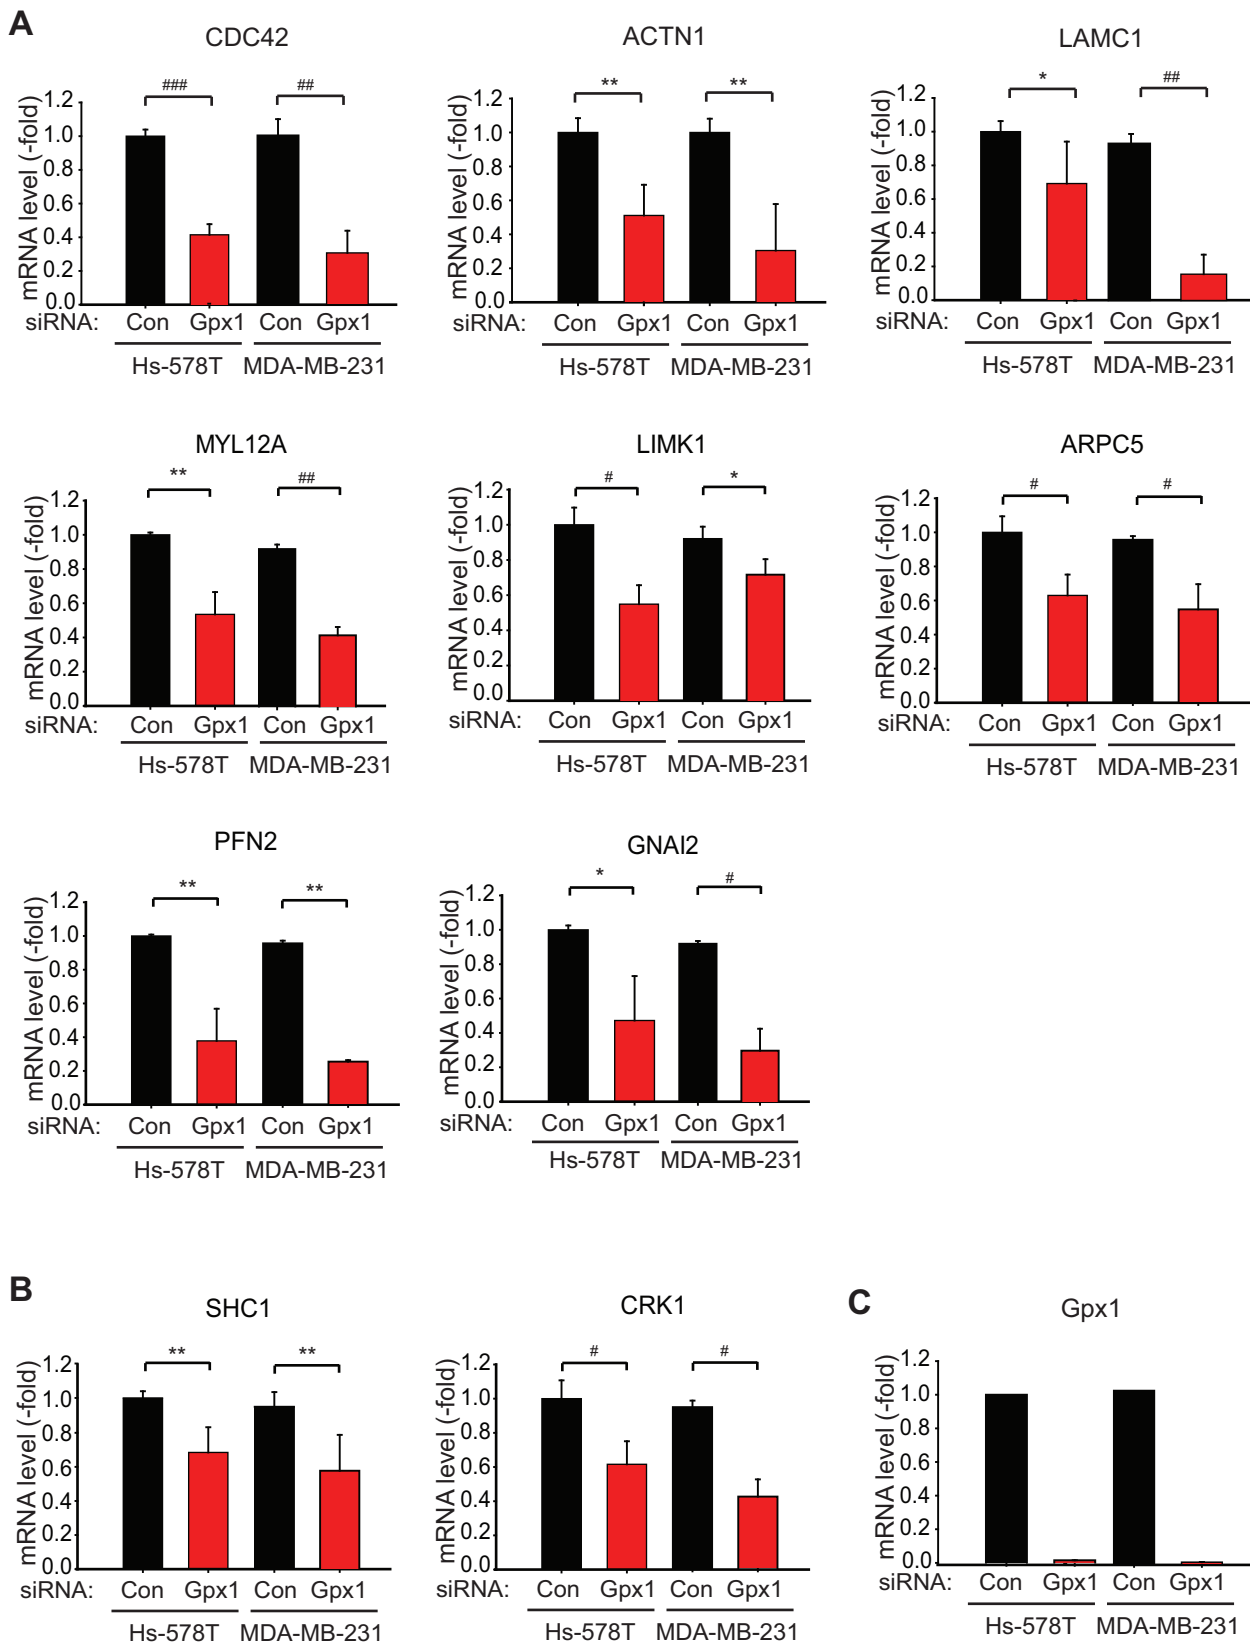

**Figure S5. Expression levels of some genes down-regulated by the Gpx1 depletion.**

The expressions of the cell junction/adhesion-related genes (A) and proliferation-related genes (B) were measured by quantitative real-time PCR (qPCR) in the Gpx1-depleted Hs578T and MDA-MB-231 cells. Data in the graph are means  $\pm$  SD of the fold change ( $n = 3$ , \* $P < 0.05$ , \*\* $P < 0.001$ , # $P < 0.0001$ , ## $P < 0.00005$ ).

The levels of Gpx1 expression and knockdown were also evaluated by the qPCR (C).
